# Supplementary material for: Neuroplastin expression is essential for hearing and hair cell PMCA expression
Source: PubMed Central journal article supplement (PMC8096745; doi:10.1007/s00429-021-02269-w), 2021-04-12

# SUPPLEMENTARY FIGURE 1

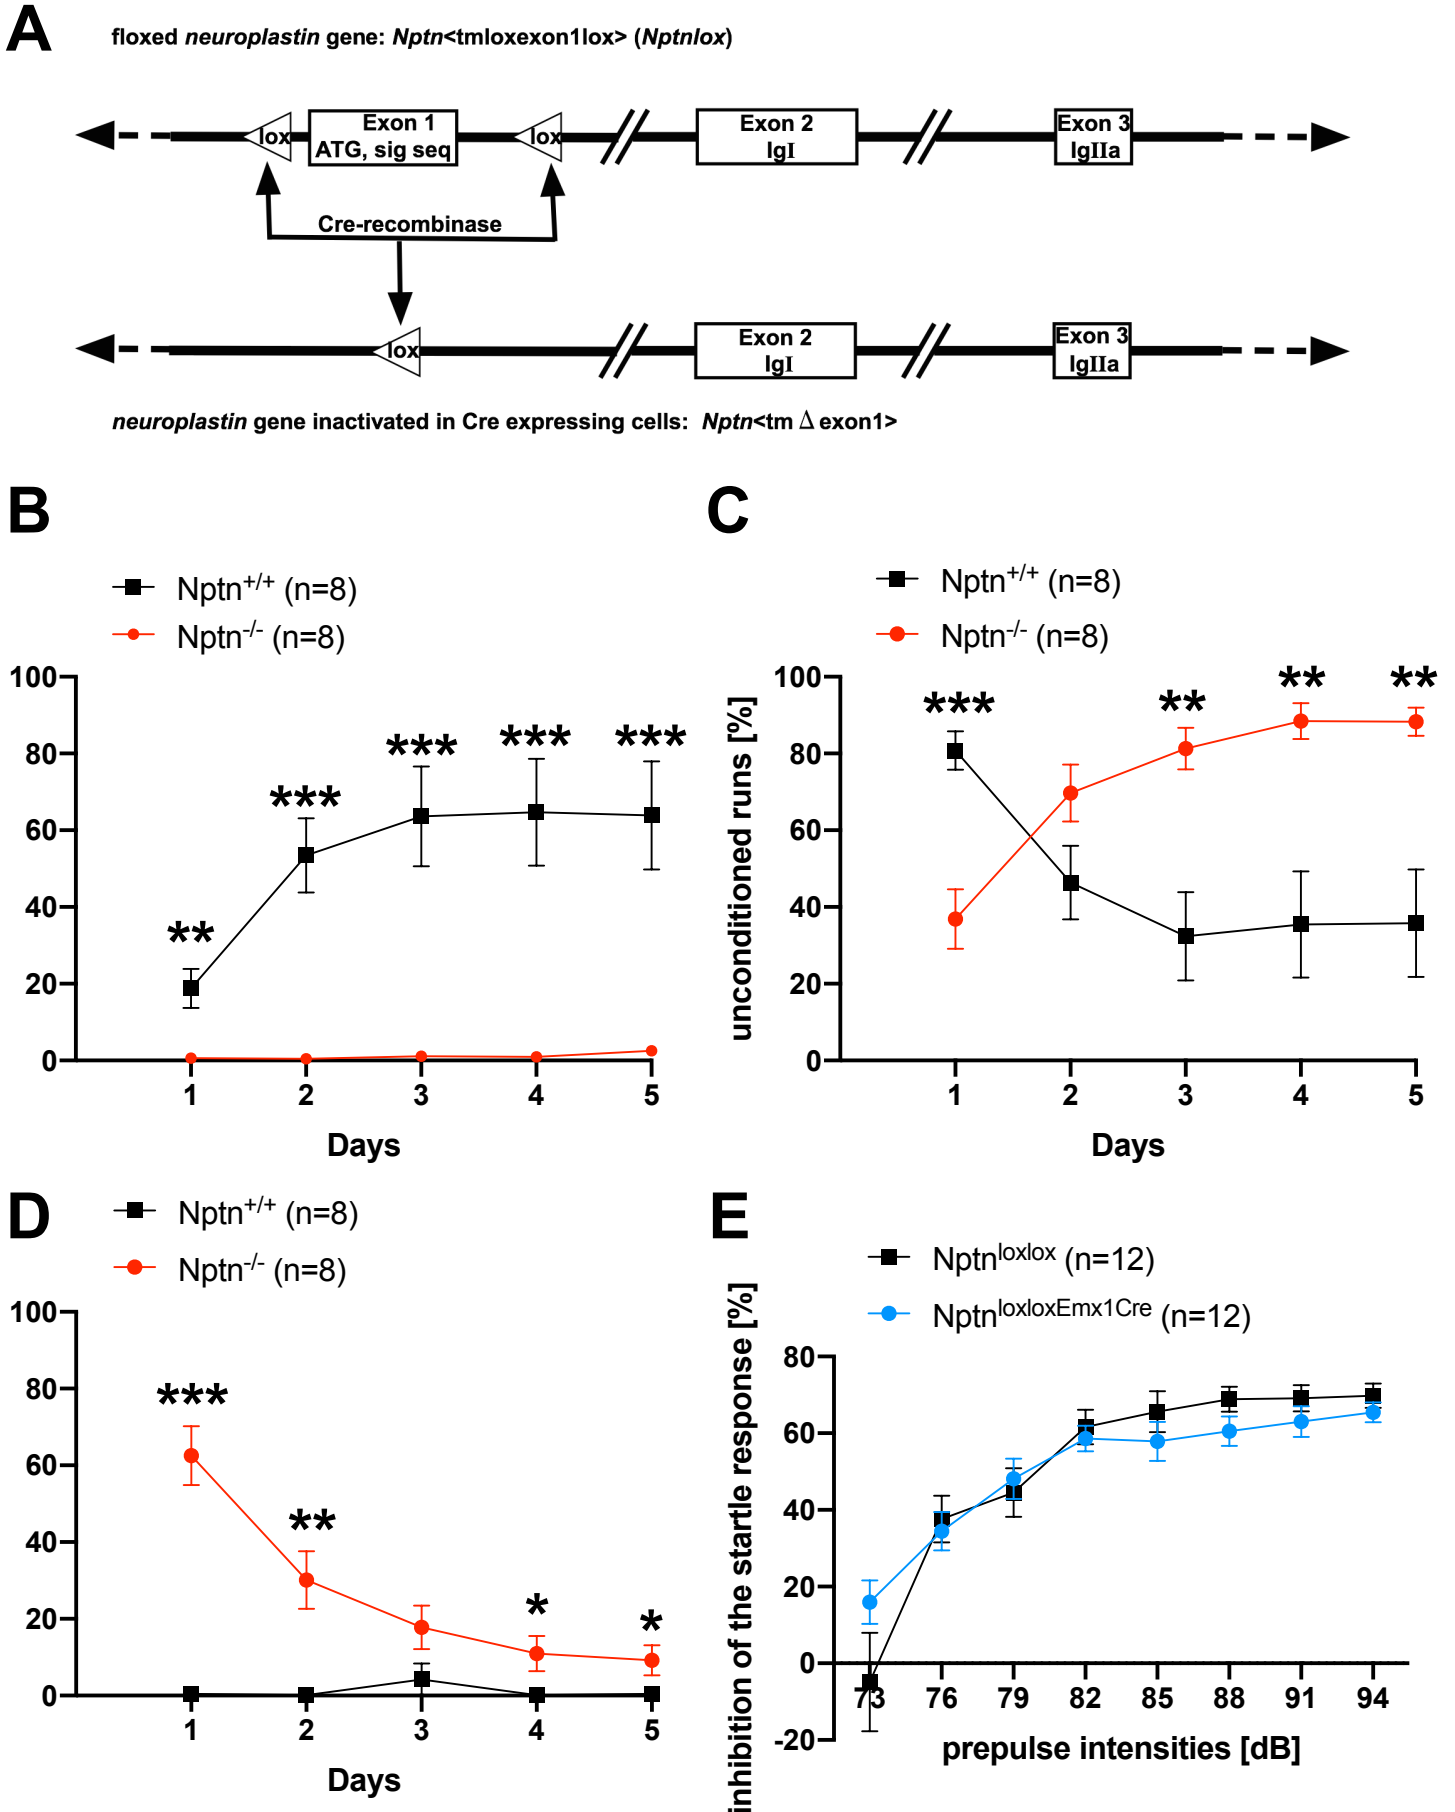

# SUPPLEMENTARY FIGURE 2

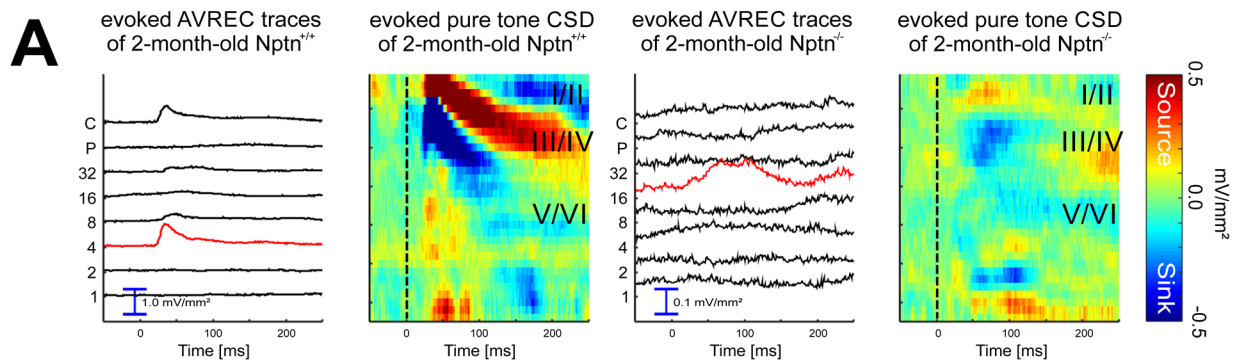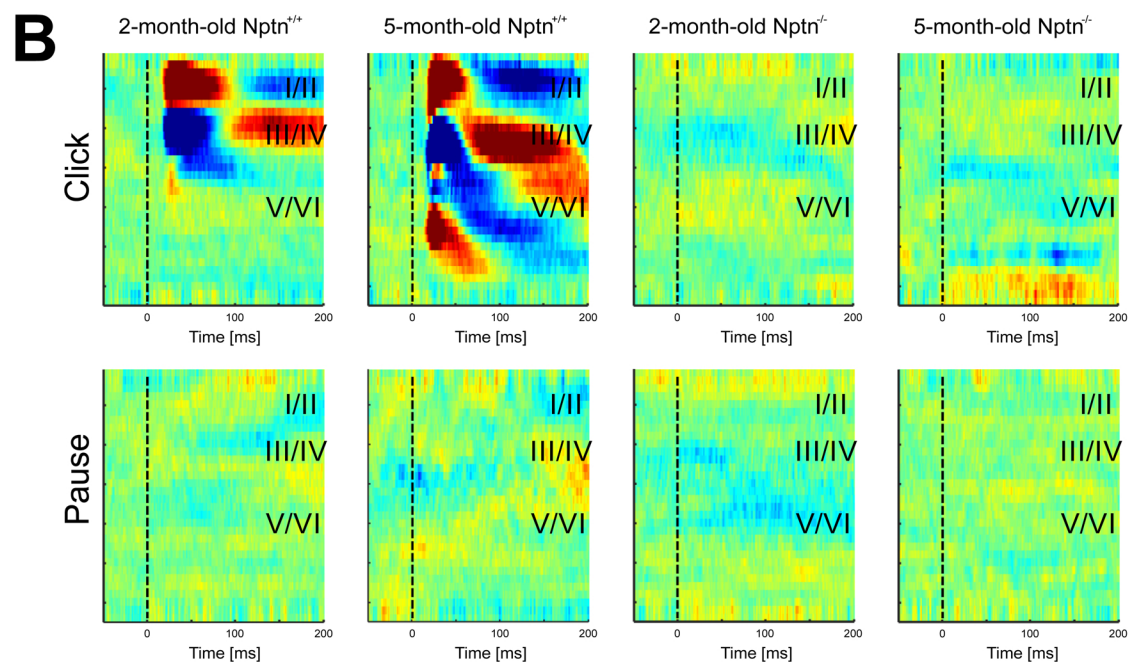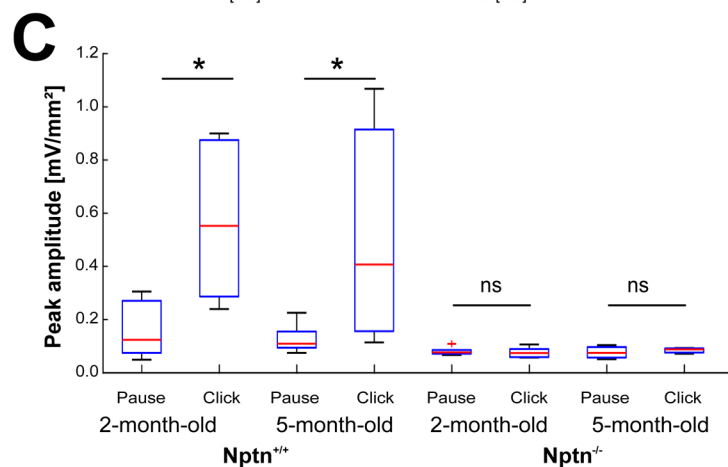

# SUPPLEMENTARY FIGURE 3

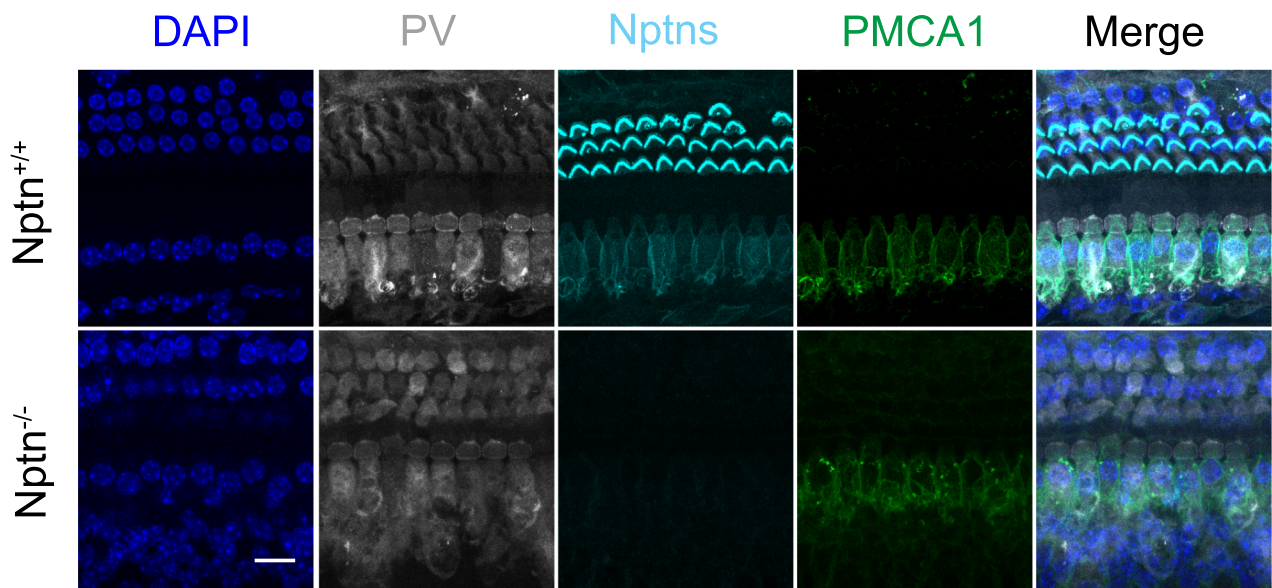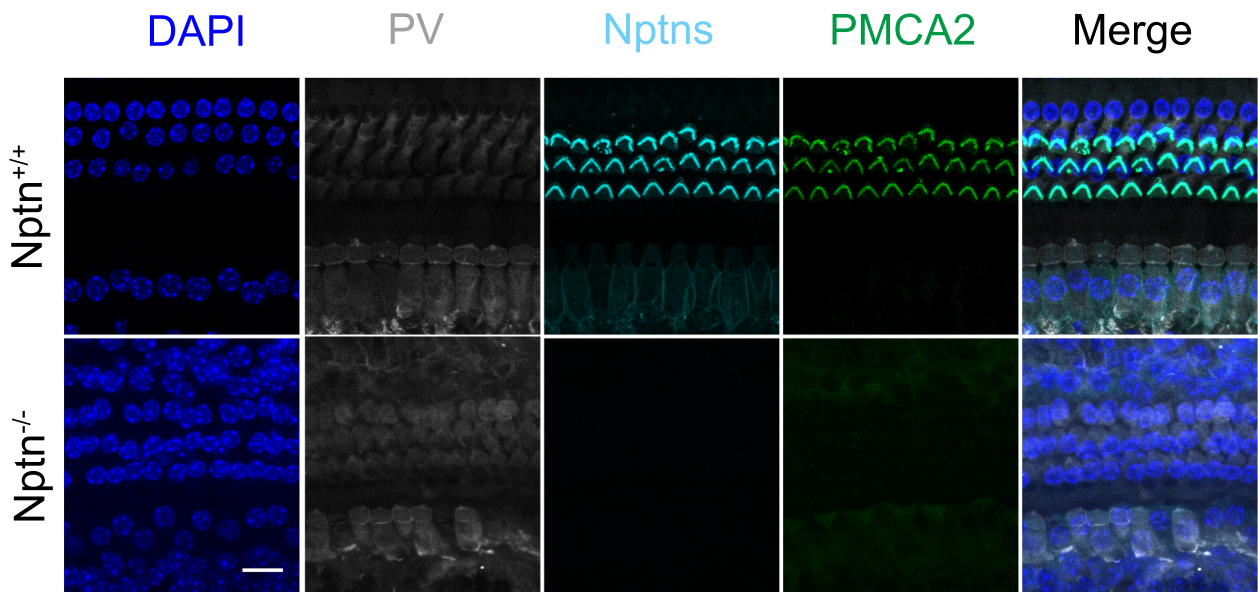

# SUPPLEMENTARY FIGURE 4

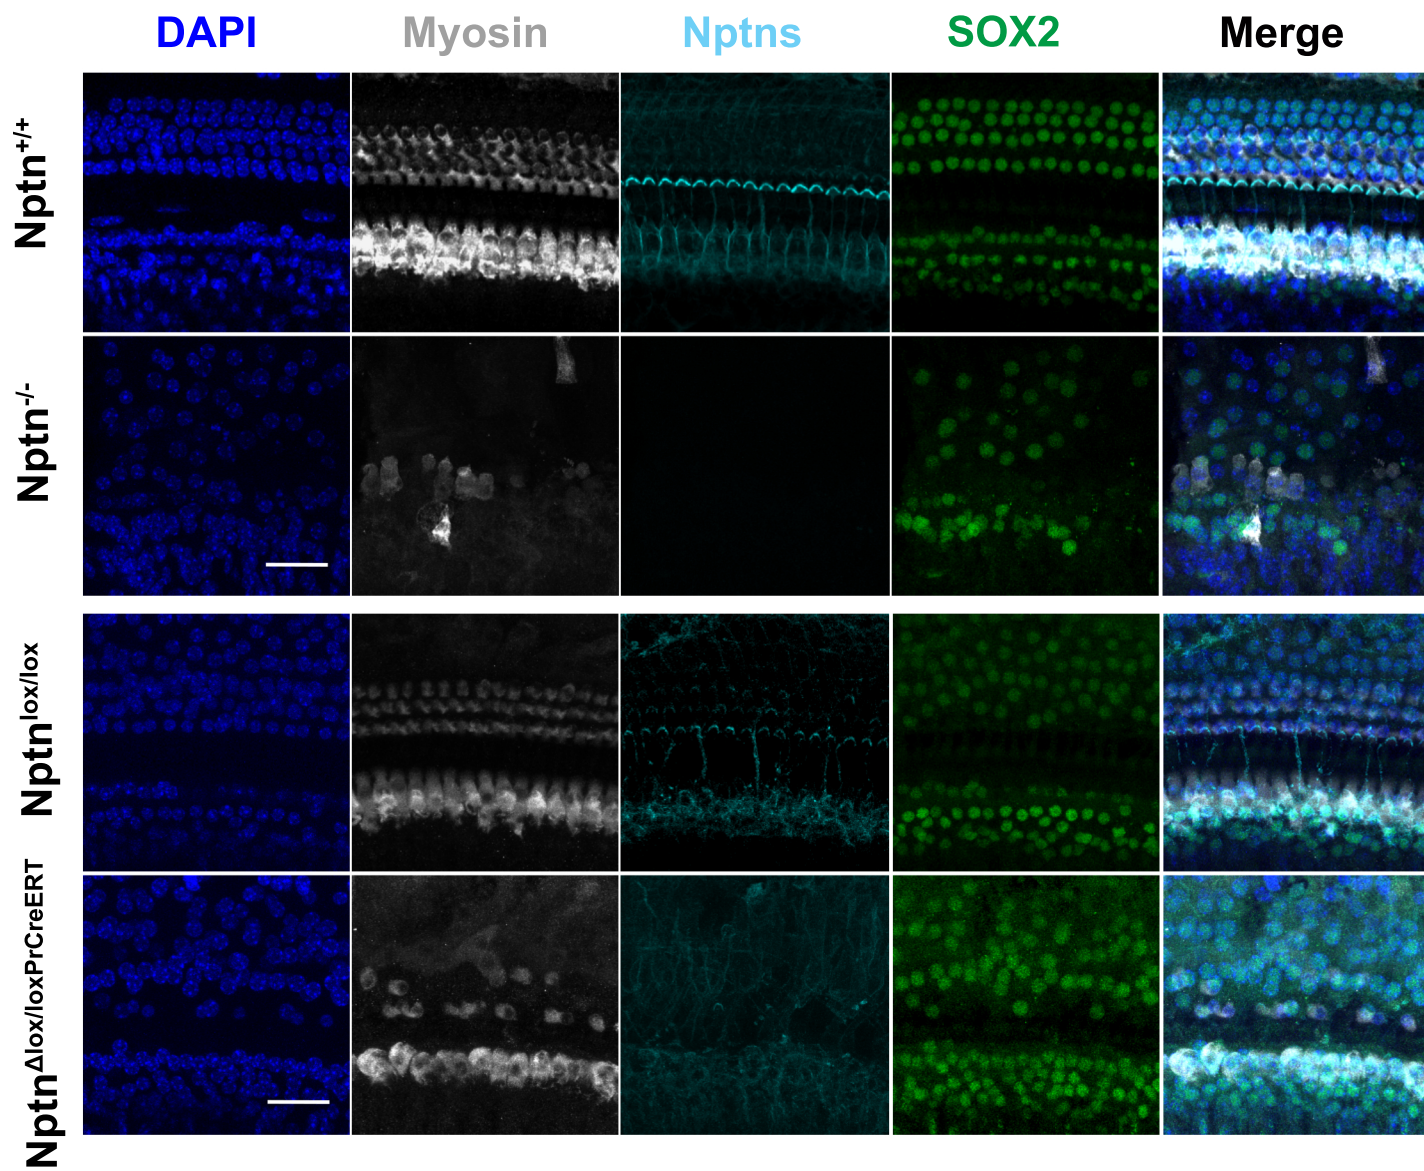

Supplement: 429_2021_2269_MOESM1_ESM.pdf [file 429_2021_2269_MOESM1_ESM.pdf]
